# Supplementary material for: Regular Yogurt Intake and Risk of Cardiovascular Disease Among Hypertensive Adults
Source: Oxford University Press journal article supplement (doi:10.1093/ajh/hpx220), 2018-01-03
Supplement: ajh_31_5_557_s1.doc [file ajh_31_5_557_s1.doc]

Supplemental Table 1: Associations Between Yogurt Intake and Risks of Revascularization (CABG) and CVD (Major CHD, Stroke, and CABG) in Two Cohorts

|  | **Risk of Revascularization (CABG)** | | | | | | | | | |
| --- | --- | --- | --- | --- | --- | --- | --- | --- | --- | --- |
|  | **NHS** | | | | **HPFS** | | | | | |
| Yogurt Intake1 | Cases | IR | Age-adjusted  HR (95% CI) | Multivariable  HR (95% CI)2 | Cases | | IR | | Age-adjusted  HR (95% CI) | Multivariable  HR (95% CI)2 |
| <1/month | 1585 | 504 | 1.00 | 1.00 | 1273 | | 1173 | | 1.00 | 1.00 |
| 1/month-<1/week | 631 | 433 | 0.86 (0.78-0.94) | 0.91 (0.83-1.00) | 387 | | 1038 | | 0.92 (0.82-1.03) | 0.94 (0.84-1.06) |
| 1-<2/week | 583 | 463 | 0.82 (0.75-0.91) | 0.89 (0.81-0.98) | 260 | | 1051 | | 0.88 (0.77-1.01) | 0.91 (0.79-1.05) |
| ≥2/week | 501 | 411 | 0.75 (0.68-0.83) | 0.84 (0.76-0.94) | 228 | | 1169 | | 0.99 (0.86-1.14) | 1.04 (0.90-1.21) |
| *P for linear trend3* | | | *<0.001* | *<0.01* |  | |  | | *0.66* | *0.74* |
|  | **Risk of Incident Major CHD, Stroke, or Revascularization** | | | | | | | | | |
|  | **NHS** | | | | **HPFS** | | | | | |
| Yogurt Intake1 | Cases | IR | Age-adjusted  HR (95% CI) | Multivariable  HR (95% CI)2 | Cases | IR | | Age-adjusted  HR (95% CI) | | Multivariable  HR (95% CI)2 |
| <1/month | 2798 | 891 | 1.00 | 1.00 | 1907 | 1750 | | 1.00 | | 1.00 |
| 1/month-<1/week | 1086 | 746 | 0.86 (0.80-0.92) | 0.92 (0.86-0.99) | 560 | 1493 | | 0.91 (0.83-1.00) | | 0.94 (0.85-1.03) |
| 1-<2/week | 976 | 777 | 0.83 (0.77-0.89) | 0.91 (0.85-0.99) | 367 | 1479 | | 0.85 (0.76-0.96) | | 0.88 (0.79-0.99) |
| ≥2/week | 840 | 690 | 0.77 (0.71-0.83) | 0.87 (0.80-0.95) | 299 | 1528 | | 0.88 (0.78-1.00) | | 0.92 (0.81-1.05) |
| *P for linear trend3* | | | *<0.001* | *<0.01* |  |  | | *0.02* | | *0.13* |
|  | **META-ANALYSIS** | | | | | | | | | |
|  | **Risk of Revascularization (CABG)** | | | | **Risk of Major CHD, Stroke, or Revascularization** | | | | | |
| Yogurt Intake1 | Cases | IR | Age-adjusted  HR (95% CI) | Multivariable  HR (95% CI)2 | Cases | | IR | | Age-adjusted  HR (95% CI) | Multivariable  HR (95% CI)2 |
| <1/month | 2858 | 675 | 1.00 | 1.00 | 4705 | | 1112 | | 1.00 | 1.00 |
| 1/month-<1/week | 1018 | 556 | 0.88 (0.82-0.95) | 0.92 (0.86-0.99) | 1646 | | 899 | | 0.88 (0.83-0.93) | 0.93 (0.88-0.98) |
| 1-<2/week | 843 | 560 | 0.84 (0.78-0.91) | 0.90 (0.83-0.97) | 1343 | | 893 | | 0.84 (0.79-0.89) | 0.90 (0.85-0.96) |
| ≥2/week | 729 | 515 | 0.83 (0.76-0.90) | 0.91 (0.83-0.99) | 1139 | | 806 | | 0.80 (0.75-0.85) | 0.89 (0.83-0.95) |
| *P for linear trend3* | | | *<0.001* | *<0.01* |  | |  | | *<0.001* | *<0.001* |
| *I2* | | | *87.3* | *56.4* |  | |  | | *61.2* | *0.0* |

CHD, Coronary Heart Disease; NHS, Nurses’ Health Study; HPFS, Health Professionals Follow-Up Study; IR, incidence rate per 100,000 person-years; HR, hazard ratio; CI, confidence interval; CABG, coronary artery bypass grafting.

1Cumulative average of yogurt intake was calculated from first report of HBP up to the first of the following events: CVD diagnosis, lost to follow up, death, end of study.

2Adjusted for age, race, smoking (defined as never, past, current with 1-14 cigs/d, current with 15-24 c/d, 25+ c/d), family history of MI, physical activity (continuous from baseline), BMI, BP-lowering medication use, and intakes of total energy, alcohol, trans fatty acids, fiber, milk and cheese.

3Linear trend across yogurt intake categories was quantified with a Wald test for linear trend by assigning the median value to each category and modeling it as a continuous variable.
