# Supplementary material for: Regular Yogurt Intake and Risk of Cardiovascular Disease Among Hypertensive Adults
Source: Oxford University Press journal article supplement (doi:10.1093/ajh/hpx220), 2018-01-03
Supplement: ajh_31_5_557_s2.doc [file ajh_31_5_557_s2.doc]

Supplemental Table 2: Yogurt Intake with DASH Diet Scores and Risks of Revascularization (CABG) and CVD (Major CHD, Stroke, and CABG) in Two Cohorts

|  | **Risk of Revascularization** | | | | | | | |
| --- | --- | --- | --- | --- | --- | --- | --- | --- |
|  | **NHS** | | | | **HPFS** | | | |
| Yogurt / DASH  Diet Score1 | Cases | IR | Age-adjusted  HR (95% CI) | Multivariable  HR (95% CI)2 | Cases | IR | Age-adjusted  HR (95% CI) | Multivariable  HR (95% CI)2 |
| Low / Low | 1752 | 481 | 1.00 | 1.00 | 1112 | 1129 | 1.00 | 1.00 |
| Low / High | 1047 | 471 | 0.89 (0.82-0.96) | 1.00 (0.92-1.09) | 699 | 1147 | 0.94 (0.85-1.04) | 0.96 (0.87-1.07) |
| High / Low | 211 | 412 | 0.83 (0.72-0.95) | 0.87 (0.76-1.01) | 128 | 1043 | 0.91 (0.75-1.09) | 0.92 (0.77-1.11) |
| High / High | 290 | 410 | 0.75 (0.66-0.85) | 0.88 (0.77-1.01) | 209 | 1137 | 0.91 (0.79-1.06) | 0.96 (0.81-1.12) |
|  | **Risk of Major CHD, Stroke, or Revascularization** | | | | | | | |
|  | **NHS** | | | | **HPFS** | | | |
| Yogurt / DASH  Diet Score1 | Cases | IR | Age-adjusted  HR (95% CI) | Multivariable  HR (95% CI)2 | Cases | IR | Age-adjusted  HR (95% CI) | Multivariable  HR (95% CI)2 |
| Low / Low | 3021 | 831 | 1.00 | 1.00 | 1620 | 1641 | 1.00 | 1.00 |
| Low / High | 1839 | 828 | 0.87 (0.82-0.92) | 1.00 (0.94-1.06) | 1048 | 1709 | 0.92 (0.85-0.99) | 0.95 (0.87-1.03) |
| High / Low | 352 | 688 | 0.85 (0.76-0.94) | 0.90 (0.81-1.01) | 180 | 1464 | 0.90 (0.77-1.05) | 0.92 (0.78-1.07) |
| High / High | 488 | 691 | 0.75 (0.68-0.82) | 0.90 (0.81-0.99) | 285 | 1542 | 0.83 (0.73-0.94) | 0.87 (0.76-0.99) |
|  | **META-ANALYSIS** | | | | | | | |
|  | **Risk of Revascularization** | | | | **Risk of Major CHD, Stroke, or Revascularization** | | | |
| Yogurt / DASH  Diet Score1 | Cases | IR | Age-adjusted  HR (95% CI) | Multivariable  HR (95% CI)2 | Cases | IR | Age-adjusted  HR (95% CI) | Multivariable  HR (95% CI)2 |
| Low / Low | 2864 | 619 | 1.00 | 1.00 | 4641 | 1004 | 1.00 | 1.00 |
| Low / High | 1746 | 617 | 0.91 (0.85-0.96) | 0.99 (0.93-1.05) | 2887 | 1019 | 0.88 (0.84-0.93) | 0.98 (0.93-1.03) |
| High / Low | 339 | 533 | 0.86 (0.76-0.96) | 0.89 (0.80-1.00) | 532 | 838 | 0.86 (0.79-0.95) | 0.91 (0.83-0.99) |
| High / High | 499 | 560 | 0.81 (0.74-0.90) | 0.91 (0.82-1.01) | 773 | 868 | 0.78 (0.72-0.84) | 0.89 (0.82-0.96) |

CHD, coronary heart disease; NHS, Nurses’ Health Study; HPFS, Health Professionals Follow-Up Study; IR, incidence rate per 100,000 person-years; HR, hazard ratio; CI, confidence interval.

1Cumulative average of yogurt intake was calculated from first report of HBP up to the first of the following events: CVD diagnosis, lost to follow up, death, end of study. Yogurt cutpoints are <2/week (low), ≥2/week (high) in NHS; <1/week (low) and ≥1/week (high) in HPFS. DASH diet score cutpoints are <25 (low) and ≥25 (high) in both cohorts.

2Adjusted for age, race, smoking (defined as never, past, current with 1-14 cigs/d, current with 15-24 c/d, 25+ c/d), family history of MI, physical activity (continuous from baseline), BMI, BP-lowering medication use, and intakes of total energy, alcohol, trans fatty acids, fiber, milk and cheese.
